# Supplementary material for: How Banks Were Chosen and Rated in Hungary before and during the COVID-19 Pandemic
Source: MDPI journal article supplement (doi:10.3390/su14116720), 2022-05-31
Supplement: s1 [file s1]

Archive with 1 entries (1 files):
- sustainability-1680645-supplementary.pdf
